# Supplementary material for: Antimicrobial exposure is associated with decreased survival in triple-negative breast cancer
Source: PubMed Central journal article supplement (PMC10097670; doi:10.1038/s41467-023-37636-0), 2023-04-12
Supplement: 41467_2023_37636_MOESM1_ESM.pdf [file 41467_2023_37636_MOESM1_ESM.pdf]

**Supplemental Table 1:** List of medications considered as antimicrobial exposures and growth factors and their administration routes.

| <b>Medication Category (% of patients)</b> | <b>Administration route</b>                      |
|--------------------------------------------|--------------------------------------------------|
| <b>Antibiotics (84%)</b>                   |                                                  |
| Amikacin                                   | IV or injection                                  |
| Amoxicillin                                | pill or tablet, oral suspension                  |
| Ampicillin                                 | pill or tablet, oral suspension, IV or injection |
| Azithromycin                               | pill or tablet, oral suspension                  |
| Aztreonam                                  | pill or tablet, oral suspension                  |
| Bacitracin                                 | IV or injection, topical, ophthalmic             |
| Cefaclor                                   | pill or tablet                                   |
| Cefadroxil                                 | pill or tablet, oral suspension                  |
| Cefazolin                                  | IV or injection                                  |
| Cefdinir                                   | pill or tablet                                   |
| Cefepime                                   | IV or injection                                  |
| Cefixime                                   | pill or tablet                                   |
| Cefotaxime                                 | IV or injection                                  |
| Cefoxitin                                  | IV or injection                                  |
| Cefpodoxime                                | pill or tablet                                   |
| Cefprozil                                  | pill or tablet                                   |
| Ceftaroline                                | IV or injection                                  |
| Ceftazidime                                | IV or injection                                  |
| Ceftriaxone                                | IV or injection                                  |
| Cefuroxime                                 | pill or tablet, oral suspension                  |
| Cephalexin                                 | pill or tablet, oral suspension                  |
| Ciprofloxacin                              | IV or injection, pill or tablet, oral suspension |
| Clarithromycin                             | pill or tablet, oral suspension                  |
| Clindamycin                                | pill or tablet, IV or injection                  |
| Colistin                                   | IV or injection                                  |
| Dapsone                                    | pill or tablet                                   |
| Daptomycin                                 | IV or injection                                  |
| Dicloxacillin                              | pill or tablet                                   |
| Doxycycline                                | pill or tablet, IV or injection                  |
| Ertapenem                                  | IV or injection                                  |
| Erythromycin                               | pill or tablet, IV or injection, oral suspension |
| Ethambutol                                 | pill or tablet                                   |
| Fidaxomicin                                | pill or tablet                                   |
| Gentamicin                                 | IV or injection                                  |
| Imipenem                                   | IV or injection                                  |
| Isoniazid                                  | pill or tablet                                   |
| Levofloxacin                               | pill or tablet, IV or injection                  |
| Linezolid                                  | pill or tablet                                   |
| Meropenem                                  | IV or injection                                  |
| Methenamine                                | pill or tablet                                   |
| Metronidazole                              | pill or tablet, IV or injection                  |
| Minocycline                                | pill or tablet                                   |
| Moxifloxacin                               | pill or tablet, IV or injection                  |
| Nafcillin                                  | IV or injection                                  |
| Neomycin                                   | pill or tablet                                   |
| Nitrofurantoin                             | oral suspension, pill or tablet                  |
| Penicillin                                 | oral suspension                                  |
| Penicillin                                 | pill or tablet                                   |

| <b>Medication Category (% of patients)</b> | <b>Administration route</b>                      |
|--------------------------------------------|--------------------------------------------------|
| Piperacillin                               | IV or injection                                  |
| Polymyxin                                  | IV or injection, inhalation, ophthalmic          |
| Pyrazinamide                               | pill or tablet                                   |
| Rifabutin                                  | pill or tablet                                   |
| Rifampin                                   | pill or tablet                                   |
| Rifaximin                                  | pill or tablet                                   |
| Streptomycin                               | IV or injection                                  |
| Sulfamethoxazole                           | pill or tablet, oral suspension                  |
| Tetracycline                               | pill or tablet                                   |
| Tobramycin                                 | IV or injection                                  |
| Trimethoprim                               | pill or tablet                                   |
| Vancomycin                                 | pill or tablet                                   |
| <b>Antifungals (20%)</b>                   |                                                  |
| Amphotericin                               | oral suspension                                  |
| Anidulafungin                              | IV or injection                                  |
| Caspofungin                                | IV or injection                                  |
| Clotrimazole                               | Topical, oral                                    |
| Fluconazole                                | pill or tablet, oral suspension, IV or injection |
| Itraconazole                               | pill or tablet                                   |
| Ketoconazole                               | pill or tablet                                   |
| Nystatin                                   | pill or tablet, oral suspension                  |
| Oxiconazole                                | topical                                          |
| Posaconazole                               | oral suspension                                  |
| Terbinafine                                | pill or tablet                                   |
| Voriconazole                               | pill or tablet, IV or injection, oral suspension |
| <b>Growth factor support (41%)</b>         |                                                  |
| Filgrastim                                 | IV or injection, subcutaneous                    |
| Filgrastim                                 | IV or injection, subcutaneous                    |
| Filgrastim                                 | IV or injection                                  |
| Filgrastim                                 | IV or injection                                  |
| Filgrastim                                 | IV or injection                                  |
| Filgrastim                                 | IV or injection                                  |
| Neupogen                                   | IV or injection                                  |
| Neupogen                                   | IV or injection                                  |
| Neupogen                                   | IV or injection                                  |
| Pegfilgrastim                              | IV or injection                                  |
| Pegfilgrastim                              | IV or injection                                  |
| Pegfilgrastim                              | Subcutaneous                                     |
| Pegfilgrastim                              | IV or injection                                  |
| Pegfilgrastim                              | IV or injection                                  |
| Pegfilgrastim                              | IV or injection                                  |
| Sargramostim                               | IV or injection, subcutaneous                    |

**Supplemental Figure 1:** Flow diagram of patients meeting inclusion and exclusion criteria.

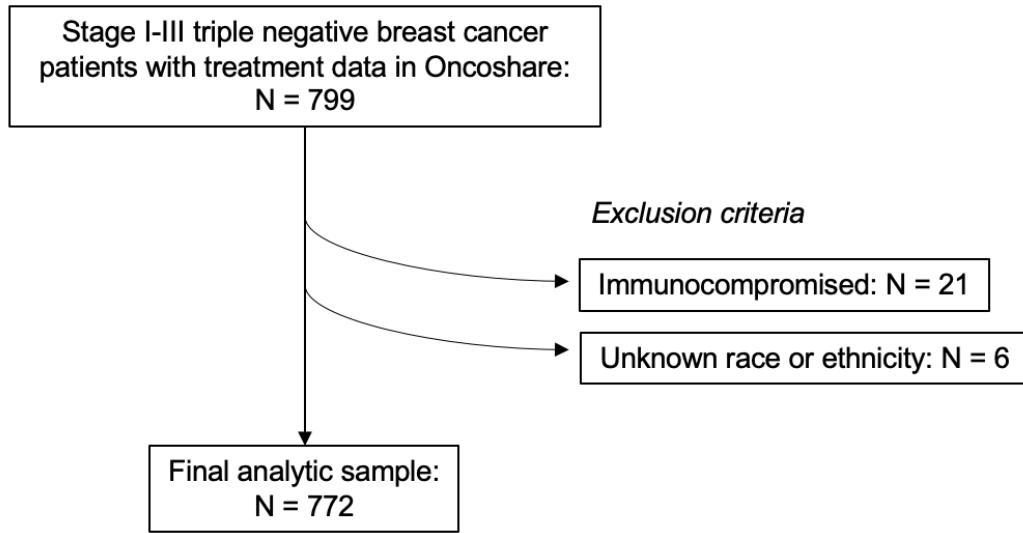

**Supplemental Figure 2:** Weighted distributions of total and unique antimicrobial prescriptions.

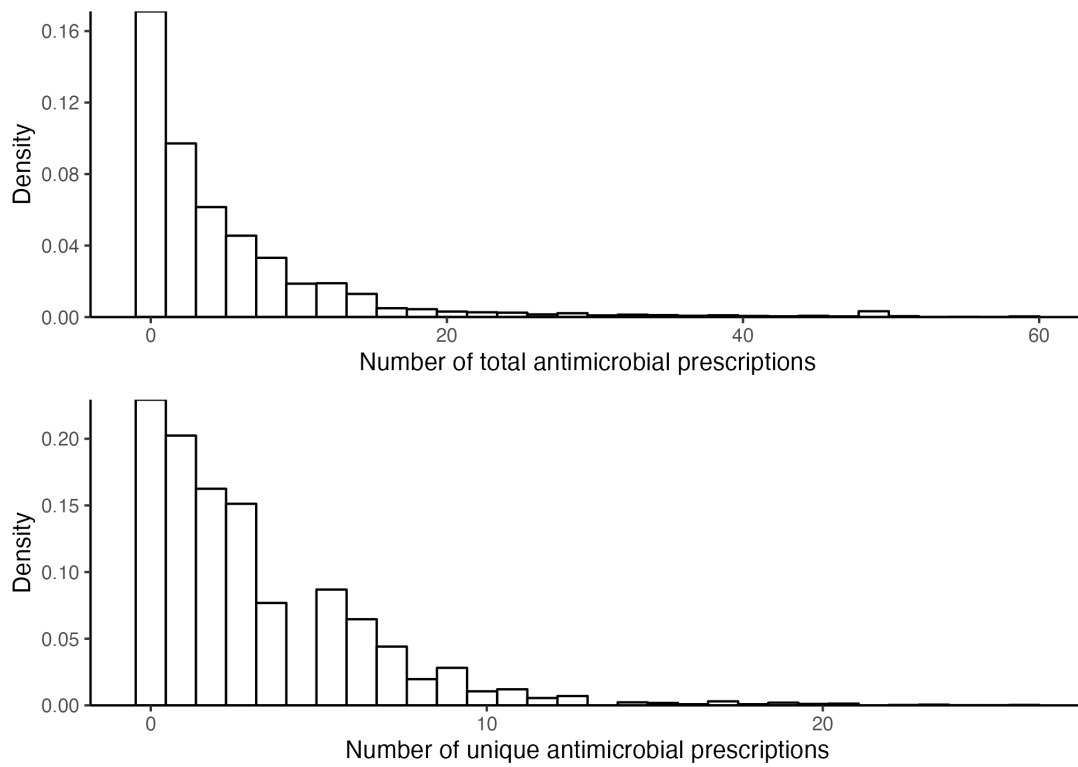

**Supplemental Table 2:** Inverse probability weighting results for any antimicrobial use.

| <b>Characteristic</b>             | <b>Hazard Ratio (95% Confidence Interval)</b> | <b>p-value</b> |
|-----------------------------------|-----------------------------------------------|----------------|
| Absolute lymphocyte count         | 0.88 (0.78 to 0.99)                           | 0.040          |
| Age at diagnosis                  | 1.01 (1.00 to 1.01)                           | 0.023          |
| Race and ethnicity                |                                               |                |
| Non-Hispanic White                | 1.0                                           |                |
| Hispanic                          | 0.93 (0.69 to 1.27)                           | 0.66           |
| Asian/Pacific Islander            | 0.84 (0.66 to 1.05)                           | 0.12           |
| Black/African American            | 0.85 (0.57 to 1.25)                           | 0.41           |
| Neighborhood socioeconomic status | 1.00 (0.93 to 1.08)                           | >0.99          |
| Stage                             |                                               |                |
| I                                 | 1.0                                           |                |
| II                                | 0.81 (0.68 to 0.98)                           | 0.028          |
| III                               | 0.80 (0.61 to 1.04)                           | 0.10           |
| Tumor grade                       |                                               |                |
| 1                                 | 1.0                                           |                |
| 2                                 | 1.48 (0.92 to 2.37)                           | 0.11           |
| 3                                 | 1.36 (0.87 to 2.15)                           | 0.18           |
| Received chemotherapy             |                                               |                |
| No                                | 1.0                                           |                |
| Yes                               | 1.15 (0.91 to 1.46)                           | 0.23           |
| Received radiotherapy             |                                               |                |
| No                                | 1.0                                           |                |
| Yes                               | 0.97 (0.81 to 1.16)                           | 0.76           |
| Ever used growth factor support   |                                               |                |
| No                                | 1.0                                           |                |
| Yes                               | 1.90 (1.60 to 2.27)                           | <0.001         |
| Surgery type                      |                                               |                |
| Lumpectomy                        | 1.0                                           |                |
| Bilateral Mastectomy              | 1.61 (1.25 to 2.08)                           | <0.001         |
| Unilateral Mastectomy             | 1.52 (1.25 to 1.85)                           | <0.001         |

Hazard ratios were adjusted for all listed covariates and reflect the risk of death for any antimicrobial use, defined as ever versus never receipt of antimicrobials during the study period. For age at diagnosis, hazard ratio indicates the risk of death per one year of age increase. For neighborhood socioeconomic status, hazard ratio represents the risk of death per increase in each socioeconomic status quintile. Two-sided p-values were derived from Wald tests.

**Supplemental Table 3:** Inverse probability weighting results for total antimicrobial exposures.

| <b>Characteristic</b>             | <b>Estimate (95% Confidence Interval)</b> | <b>p-value</b> |
|-----------------------------------|-------------------------------------------|----------------|
| Absolute lymphocyte count         | 0.02 (0.00 to 0.04)                       | 0.015          |
| Age at diagnosis                  | -0.01 (-0.02 to 0.00)                     | 0.056          |
| Race and ethnicity                |                                           |                |
| Non-Hispanic White                | 0.0                                       |                |
| Hispanic                          | -0.20 (-0.56 to 0.17)                     | 0.29           |
| Asian/Pacific Islander            | -0.23 (-0.52 to 0.05)                     | 0.11           |
| Black/African American            | -0.20 (-0.64 to 0.24)                     | 0.37           |
| Neighborhood socioeconomic status | 0.05 (-0.05 to 0.15)                      | 0.31           |
| Stage                             |                                           |                |
| I                                 | 0.0                                       |                |
| II                                | -0.10 (-0.39 to 0.19)                     | 0.50           |
| III                               | -0.62 (-1.0 to -0.22)                     | 0.002          |
| Grade                             |                                           |                |
| 1                                 | 0.0                                       |                |
| 2                                 | -0.32 (-0.95 to 0.31)                     | 0.32           |
| 3                                 | -0.52 (-1.2 to 0.12)                      | 0.11           |
| Unknown                           | -0.05 (-0.83 to 0.73)                     | 0.90           |
| Received chemotherapy             |                                           |                |
| No                                | 0.0                                       |                |
| Yes                               | 0.08 (-0.23 to 0.40)                      | 0.61           |
| Received radiotherapy             |                                           |                |
| No                                | 0.0                                       |                |
| Yes                               | -0.02 (-0.29 to 0.25)                     | 0.89           |
| Ever used growth factor support   |                                           |                |
| No                                | 0.0                                       |                |
| Yes                               | 0.34 (0.02 to 0.66)                       | 0.038          |
| Surgery type                      |                                           |                |
| Lumpectomy                        | 0.0                                       |                |
| Bilateral Mastectomy              | 0.30 (-0.09 to 0.69)                      | 0.14           |
| Unilateral Mastectomy             | 0.30 (0.00 to 0.60)                       | 0.049          |

Estimates were adjusted for all listed covariates and reflect the risk of death for each change in total number of per-month prescriptions. For age at diagnosis, estimate indicates the risk of death per one year of age increase. For neighborhood socioeconomic status, estimate represents the risk of death per increase in each socioeconomic status quintile. Two-sided p-values were derived from Wald tests.

**Supplemental Table 4:** Inverse probability weighting results for unique antimicrobial exposures.

| <b>Characteristic</b>             | <b>Estimate (95% Confidence Interval)</b> | <b>p-value</b> |
|-----------------------------------|-------------------------------------------|----------------|
| Absolute lymphocyte count         | 0.01 (0.00 to 0.02)                       | 0.072          |
| Age at diagnosis                  | 0.00 (-0.01 to 0.00)                      | 0.50           |
| Race and ethnicity                |                                           |                |
| Non-Hispanic White                | 0.0                                       |                |
| Hispanic                          | -0.01 (-0.26 to 0.23)                     | 0.93           |
| Asian/Pacific Islander            | -0.14 (-0.34 to 0.05)                     | 0.14           |
| Black/African American            | -0.03 (-0.35 to 0.30)                     | 0.87           |
| Neighborhood socioeconomic status | 0.05 (0.00 to 0.11)                       | 0.073          |
| Stage                             |                                           |                |
| I                                 | 0.0                                       |                |
| II                                | -0.10 (-0.25 to 0.04)                     | 0.17           |
| III                               | -0.32 (-0.53 to -0.10)                    | 0.004          |
| Grade                             |                                           |                |
| 1                                 | 0.0                                       |                |
| 2                                 | -0.09 (-0.44 to 0.26)                     | 0.61           |
| 3                                 | -0.11 (-0.45 to 0.23)                     | 0.53           |
| Unknown                           | 0.11 (-0.32 to 0.53)                      | 0.62           |
| Received chemotherapy             |                                           |                |
| No                                | 0.0                                       |                |
| Yes                               | 0.04 (-0.16 to 0.25)                      | 0.68           |
| Received radiotherapy             |                                           |                |
| No                                | 0.0                                       |                |
| Yes                               | 0.01 (-0.15 to 0.17)                      | 0.92           |
| Ever used growth factor support   |                                           |                |
| No                                | 0.0                                       |                |
| Yes                               | 0.32 (0.17 to 0.46)                       | <0.001         |
| Surgery type                      |                                           |                |
| Lumpectomy                        | 0.0                                       |                |
| Bilateral Mastectomy              | 0.34 (0.14 to 0.54)                       | <0.001         |
| Unilateral Mastectomy             | 0.28 (0.11 to 0.45)                       | 0.001          |

Estimates were adjusted for all listed covariates and reflect the risk of death for each change in unique number of per-month prescriptions. For age at diagnosis, estimate indicates the risk of death per one year of age increase. For neighborhood socioeconomic status, estimate represents the risk of death per increase in each socioeconomic status quintile. Two-sided p-values were derived from Wald tests.

**Supplemental Table 5:** Multivariable-adjusted hazard ratios for any, total, and unique antimicrobial exposures in the marginal structural Cox regression model.

| Antimicrobial Exposure Definition | N Events | Overall Survival                       |         | Breast Cancer-Specific Survival |                                        |         |
|-----------------------------------|----------|----------------------------------------|---------|---------------------------------|----------------------------------------|---------|
|                                   |          | Hazard Ratio (95% Confidence Interval) | p-value | N Events                        | Hazard Ratio (95% Confidence Interval) | p-value |
| Any                               | 171      | 1.46 (0.93 to 2.29)                    | 0.10    | 124                             | 1.39 (0.84 to 2.32)                    | 0.20    |
| Total                             | 205      | 1.05 (1.02 to 1.08)                    | <0.001  | 142                             | 1.05 (1.01 to 1.08)                    | 0.005   |
| Unique                            | 200      | 1.17 (1.12 to 1.23)                    | <0.001  | 143                             | 1.18 (1.13 to 1.24)                    | <0.001  |

Hazard ratios reflect the risk of death for any antimicrobial use, defined as ever versus never receipt of antimicrobials, and the risk of death for each change in cumulative number of per-month prescriptions for total and unique exposures during observation. Marginal structural Cox regression models were adjusted for the following variables: age at diagnosis, race and ethnicity, socioeconomic status quintile, cancer stage, tumor grade, receipt of chemotherapy, receipt of radiotherapy, ever use of growth factor support, and surgery type. Two-sided p-values were derived from Wald tests.

**Supplemental Table 6:** Marginal structural model adjusted for disease severity.

| Antimicrobial Exposure Definition | Overall Survival |                                        |         | Breast Cancer-Specific Survival |                                        |         |
|-----------------------------------|------------------|----------------------------------------|---------|---------------------------------|----------------------------------------|---------|
|                                   | N Events         | Hazard Ratio (95% Confidence Interval) | p-value | N Events                        | Hazard Ratio (95% Confidence Interval) | p-value |
| Any                               | 169              | 1.45 (0.93 to 2.28)                    | 0.10    | 122                             | 1.40 (0.84 to 2.34)                    | 0.20    |
| <i>Acute illness</i>              |                  | 2.07 (1.24 to 3.46)                    | 0.005   |                                 | 1.74 (0.90 to 3.36)                    | 0.10    |
| Total                             | 218              | 1.05 (1.02 to 1.08)                    | <0.001  | 154                             | 1.05 (1.02 to 1.09)                    | 0.001   |
| <i>Acute illness</i>              |                  | 2.56 (1.42 to 4.62)                    | 0.002   |                                 | 2.27 (0.99 to 5.17)                    | 0.052   |
| Unique                            | 197              | 1.16 (1.11 to 1.21)                    | <0.001  | 142                             | 1.17 (1.12 to 1.23)                    | <0.001  |
| <i>Acute illness</i>              |                  | 1.82 (1.09 to 3.02)                    | 0.021   |                                 | 1.61 (0.82 to 3.16)                    | 0.16    |

In addition to adjusting for acute illness, HRs were adjusted for all variables adjusted for in the marginal structural model, including: age at diagnosis, race and ethnicity, socioeconomic status quintile, cancer stage, tumor grade, receipt of chemotherapy, receipt of radiotherapy, ever use of growth factor support, and surgery type. Two-sided p-values were derived from Wald tests.



**Supplemental Table 7:** Unweighted versus marginal structural model adjusted hazard ratios to evaluate the impact of absolute lymphocyte versus neutrophil count on all-cause and breast cancer-specific survival related to any antimicrobial exposure.

| Characteristic            | Overall Survival Model |                     | Breast Cancer-Specific Survival Model |                     |
|---------------------------|------------------------|---------------------|---------------------------------------|---------------------|
|                           | Unweighted             | Marginal Structural | Unweighted                            | Marginal Structural |
| Absolute lymphocyte count | 1.54 (0.98 to 2.49)    | 1.46 (0.93 to 2.29) | 1.47 (0.89 to 2.45)                   | 1.39 (0.84 to 2.32) |
| Absolute neutrophil count | 1.58 (1.01 to 2.49)    | 1.58 (1.01 to 2.48) | 1.53 (0.92 to 2.54)                   | 1.52 (0.92 to 2.53) |

Results as shown as hazard ratio (95% confidence interval). Hazard ratios were adjusted for the following variables: age at diagnosis, race and ethnicity, socioeconomic status quintile, cancer stage, tumor grade, receipt of chemotherapy, receipt of radiotherapy, ever use of growth factor support, and surgery type.
